# Supplementary material
Source: PubMed Central journal article supplement (PMC2519145)
Supplement: NIHMS62090-supplement-si20061111_031.pdf [file NIHMS62090-supplement-si20061111_031.pdf]

## Supporting Information

### **Investigation of the Lactam Sidechain Length Necessary for Optimal Indenoisoquinoline Topoisomerase I Inhibition and Cytotoxicity in Human Cancer Cell Cultures**

Andrew Morrell,<sup>†</sup> Michael S. Placzek,<sup>†</sup> Jamin D. Steffen,<sup>†</sup> Smitha Antony,<sup>‡</sup>  
Keli Agama,<sup>‡</sup> Yves Pommier,<sup>‡</sup> and Mark Cushman<sup>†,\*</sup>

*Department of Medicinal Chemistry and Molecular Pharmacology, School of Pharmacy and  
Pharmaceutical Sciences, and the Purdue Cancer Center, Purdue University, West Lafayette, IN  
47907, USA*

*Laboratory of Molecular Pharmacology, Center for Cancer Research, National Cancer Institute,  
Bethesda, MD 20892-4255, USA*

|                    |    |
|--------------------|----|
| Title page         | S1 |
| Elemental Analyses | S2 |

---

<sup>†</sup>Purdue University

<sup>‡</sup>National Cancer Institute

\*Corresponding Author: Phone number: 765-494-1465; fax number: 765-494-6790, e-mail:  
cushman@pharmacy.purdue.edu

### Elemental Analyses

| Compound | Molecular Formula                      |       | C %   | H %   | N %   |
|----------|----------------------------------------|-------|-------|-------|-------|
| 19       | $C_{16}H_{34}N_2O_2$                   | Calc. | 67.09 | 11.96 | 9.78  |
|          |                                        | Found | 66.86 | 11.88 | 9.65  |
| 25       | $C_{16}H_{10}N_2O_2 \cdot 0.25 H_2O$   | Calc. | 72.04 | 3.97  | 10.50 |
|          |                                        | Found | 71.79 | 3.99  | 10.56 |
| 31       | $C_{28}H_{32}N_2O_4$                   | Calc. | 73.02 | 7.00  | 6.08  |
|          |                                        | Found | 72.86 | 7.13  | 5.96  |
| 32       | $C_{29}H_{34}N_2O_4$                   | Calc. | 73.39 | 7.22  | 5.90  |
|          |                                        | Found | 73.22 | 7.04  | 5.74  |
| 33       | $C_{30}H_{36}N_2O_4$                   | Calc. | 73.74 | 7.43  | 5.73  |
|          |                                        | Found | 73.67 | 7.24  | 5.60  |
| 34       | $C_{31}H_{38}N_2O_4$                   | Calc. | 74.07 | 7.62  | 5.57  |
|          |                                        | Found | 73.90 | 7.52  | 5.46  |
| 35       | $C_{32}H_{40}N_2O_4$                   | Calc. | 74.39 | 7.80  | 5.42  |
|          |                                        | Found | 74.26 | 7.96  | 5.14  |
| 36       | $C_{33}H_{42}N_2O_4$                   | Calc. | 74.69 | 7.98  | 5.28  |
|          |                                        | Found | 74.43 | 7.91  | 4.94  |
| 40       | $C_{21}H_{21}ClN_2O_2 \cdot 0.75 H_2O$ | Calc. | 65.96 | 5.93  | 7.33  |
|          |                                        | Found | 66.25 | 5.61  | 7.37  |
| 41       | $C_{22}H_{23}ClN_2O_2 \cdot 0.5 H_2O$  | Calc. | 67.43 | 6.17  | 7.15  |
|          |                                        | Found | 67.06 | 5.86  | 7.13  |
| 42       | $C_{23}H_{25}ClN_2O_2 \cdot 0.5 H_2O$  | Calc. | 68.06 | 6.46  | 6.90  |
|          |                                        | Found | 67.96 | 6.21  | 6.90  |
| 43       | $C_{24}H_{27}ClN_2O_2 \cdot 0.75 H_2O$ | Calc. | 67.91 | 6.77  | 6.60  |
|          |                                        | Found | 67.97 | 6.67  | 6.23  |
| 44       | $C_{25}H_{29}ClN_2O_2 \cdot 0.75 H_2O$ | Calc. | 68.48 | 7.01  | 6.39  |
|          |                                        | Found | 68.44 | 7.06  | 6.45  |
| 45       | $C_{26}H_{31}ClN_2O_2 \cdot 0.5 H_2O$  | Calc. | 69.71 | 7.20  | 6.25  |
|          |                                        | Found | 69.51 | 6.95  | 6.42  |
| 46       | $C_{27}H_{33}ClN_2O_2 \cdot 1.0 H_2O$  | Calc. | 68.85 | 7.49  | 5.95  |
|          |                                        | Found | 69.18 | 7.30  | 5.91  |
| 47       | $C_{28}H_{35}ClN_2O_2 \cdot 1.25 H_2O$ | Calc. | 68.89 | 7.72  | 5.72  |
|          |                                        | Found | 68.89 | 7.42  | 5.78  |
| 48       | $C_{22}H_{14}N_2O_2$                   | Calc. | 78.09 | 4.17  | 8.28  |
|          |                                        | Found | 77.73 | 4.19  | 8.21  |
| 49       | $C_{22}H_{15}ClN_2O_2$                 | Calc. | 70.50 | 4.03  | 7.47  |
|          |                                        | Found | 70.13 | 3.88  | 7.45  |
| 50       | $C_{23}H_{17}ClN_2O_2$                 | Calc. | 71.04 | 4.41  | 7.20  |
|          |                                        | Found | 71.43 | 4.29  | 7.38  |
| 51       | $C_{23}H_{16}N_2O_2 \cdot 0.55 H_2O$   | Calc. | 76.25 | 4.76  | 7.73  |
|          |                                        | Found | 75.94 | 4.47  | 7.80  |
